CORRECTION

# Correction: From North American hegemony to global competition for scientific leadership? Insights from the Nobel population

Thomas Heinze, Arlette Jappe, David Pithan

The graph for [S4 Fig](#) is incorrect and the legends for [S4–S6 Figs](#) are incorrect. Please see the corrected [S4–S6 Figs](#) below.

## Supporting information

**S4 Fig. Master–apprentice relations in Chemistry (North America).** Master–apprentice relations among Nobel laureates in Chemistry (North America). Underlined names are from other regions.  
(EPS)

**S5 Fig. Master–apprentice relations in Physiology or Medicine (Europe).** Master–apprentice relations among Nobel laureates in Physiology or Medicine (Europe). Underlined names are from other regions.  
(EPS)

**S6 Fig. Master–apprentice relations in Physiology or Medicine (North America).** Master–apprentice relations among Nobel laureates in Physiology or Medicine (North America). Underlined names are from other regions.  
(EPS)

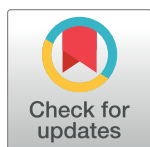

## Reference

1. Heinze T, Jappe A, Pithan D (2019) From North American hegemony to global competition for scientific leadership? Insights from the Nobel population. PLoS ONE 14(4): e0213916. <https://doi.org/10.1371/journal.pone.0213916> PMID: 30943240

## OPEN ACCESS

**Citation:** Heinze T, Jappe A, Pithan D (2019) Correction: From North American hegemony to global competition for scientific leadership? Insights from the Nobel population. PLoS ONE 14(7): e0219582. <https://doi.org/10.1371/journal.pone.0219582>

**Published:** July 9, 2019

**Copyright:** © 2019 Heinze et al. This is an open access article distributed under the terms of the [Creative Commons Attribution License](#), which permits unrestricted use, distribution, and reproduction in any medium, provided the original author and source are credited.
